# Supplementary material for: Insights into the pathophysiology of DFNA10 hearing loss associated with novel EYA4 variants
Source: PubMed Central journal article supplement (PMC7148344; doi:10.1038/s41598-020-63256-5), 2020-04-10
Supplement: 41598_2020_63256_MOESM1_ESM.pdf [file 41598_2020_63256_MOESM1_ESM.pdf]

# ***Insights into the pathophysiology of DFNA10 hearing loss associated with novel EYA4 variants***

Matias Morín<sup>1</sup>, Lucía Borreguero<sup>1</sup>, Kevin T Booth<sup>2,3</sup>, María Lachgar<sup>1</sup>, Patrick Huygen<sup>4</sup>, Manuela Villamar<sup>1</sup>, Fernando Mayo<sup>1</sup>, Luis Carlos Barrio<sup>5</sup>, Luciana Santos Serrão de Castro<sup>1</sup>, Carmelo Morales<sup>6</sup>, Ignacio del Castillo<sup>1</sup>, Beatriz Arellano<sup>7</sup>, Dolores Tellería<sup>1</sup>, Richard JH Smith<sup>2</sup>, Hela Azaiez<sup>2</sup>; M.A. Moreno-Pelayo<sup>1\*</sup>

1 Servicio de Genética, Ramón y Cajal Institute of Health Research (IRYCIS) and Biomedical Network Research Centre on Rare Diseases (CIBERER), 28034 Madrid, Spain.

2 Molecular Otolaryngology and Renal Research Laboratories, Department of Otolaryngology, Head & Surgery, University of Iowa, Iowa City, Iowa, 52242, USA.

3 Harvard Medical School, Department of Neurobiology, Boston Massachusetts, 02115.

4 Department of Otorhinolaryngology, Radboud University Nijmegen Medical Centre, Nijmegen, Netherlands.

5 Departamento de Investigación, Ramón y Cajal Institute of Health Research (IRYCIS), Unidad de Neurología Experimental, 28034 Madrid, Spain.

6 Servicio de Otorrinolaringología, Hospital Universitario Marqués de Valdecilla, 39008 Santander, Spain.

7 Servicio de Otorrinolaringología, Hospital Universitario Puerta de Hierro, Majadahonda, 28922 Madrid, Spain.

\*Corresponding author:

Dr. Miguel Angel Moreno-Pelayo

Servicio de Genética-Hospital Ramón y Cajal,

Ctra. Colmenar Km 9, 28034-Madrid-Spain

Phone: 00-34-91-3368542

[mmorenop@salud.madrid.org](mailto:mmorenop@salud.madrid.org)

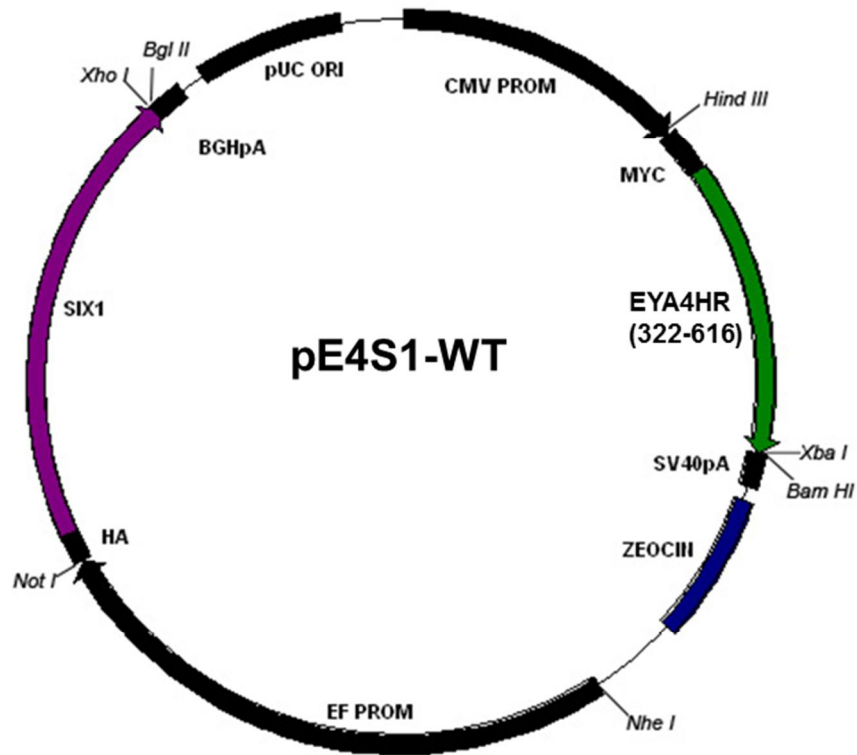

**SUPL FIG1.** Diagram of the bicistronic plasmid pE4S1. This vector contains the c-myc-tagged *EYA4*-HR DNA fragment that encodes from amino acids 322 until 616 of the HR domain under control of the CMV promoter and the HA-tagged Six1 protein under the EF-1 promoter.

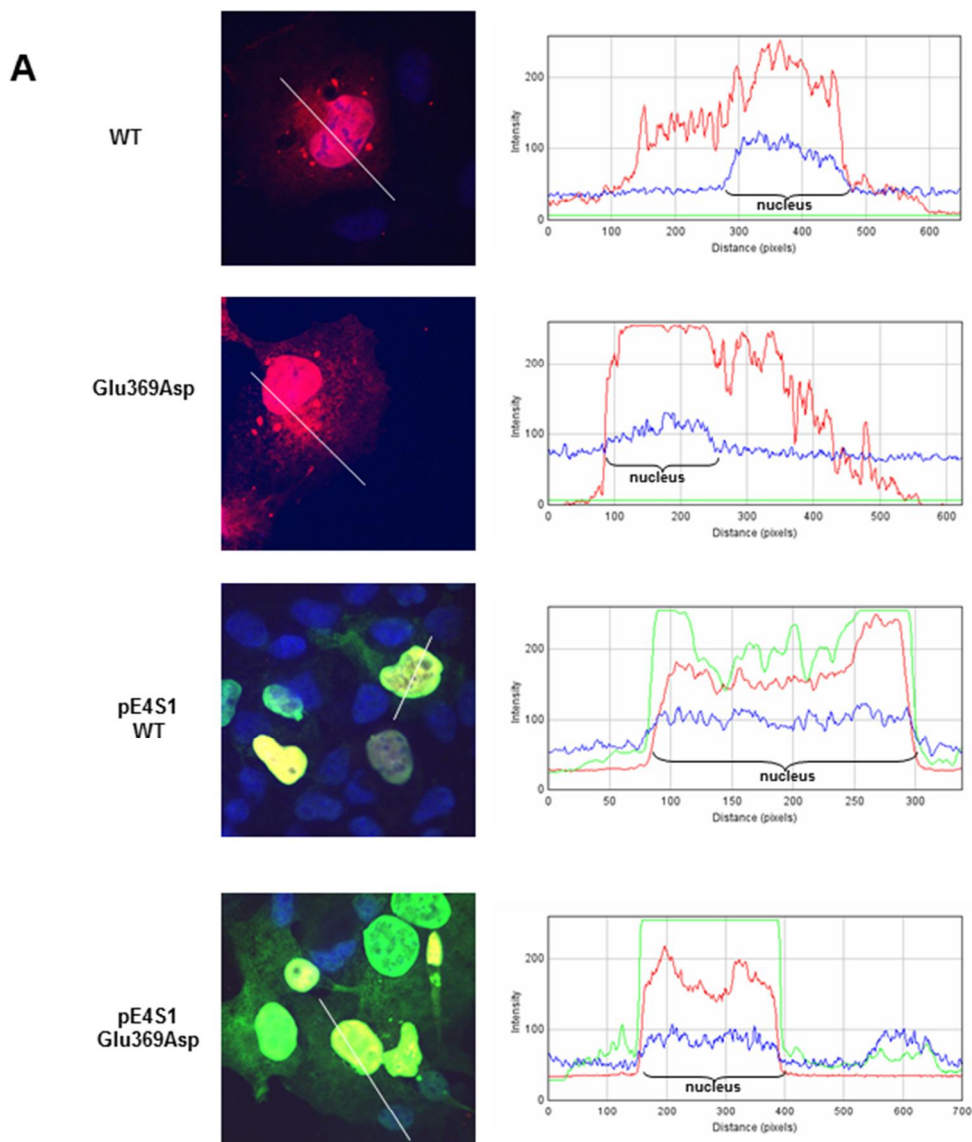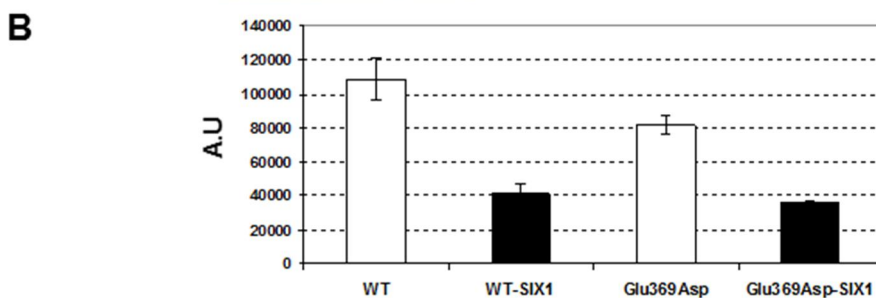

**SUPL FIG2. A)** Spatial distribution of *EYA4* in the absence and presence of Six 1. Image J sectional graphic analysis showing the fluorescence intensity plotted against the distance. In the presence of Six 1 both, the pE4S1-wt and the mutant pE4S1-Glu369Asp protein complexes are mainly detected in the nucleus (green and red lines). **B)** The cytoplasmic expression of *EYA4*-HR protein was significantly reduced in the presence of Six1 in both the wt and Glu369Asp proteins (black bars) when compared with the intensity obtained in the absence of Six 1 (white bars).

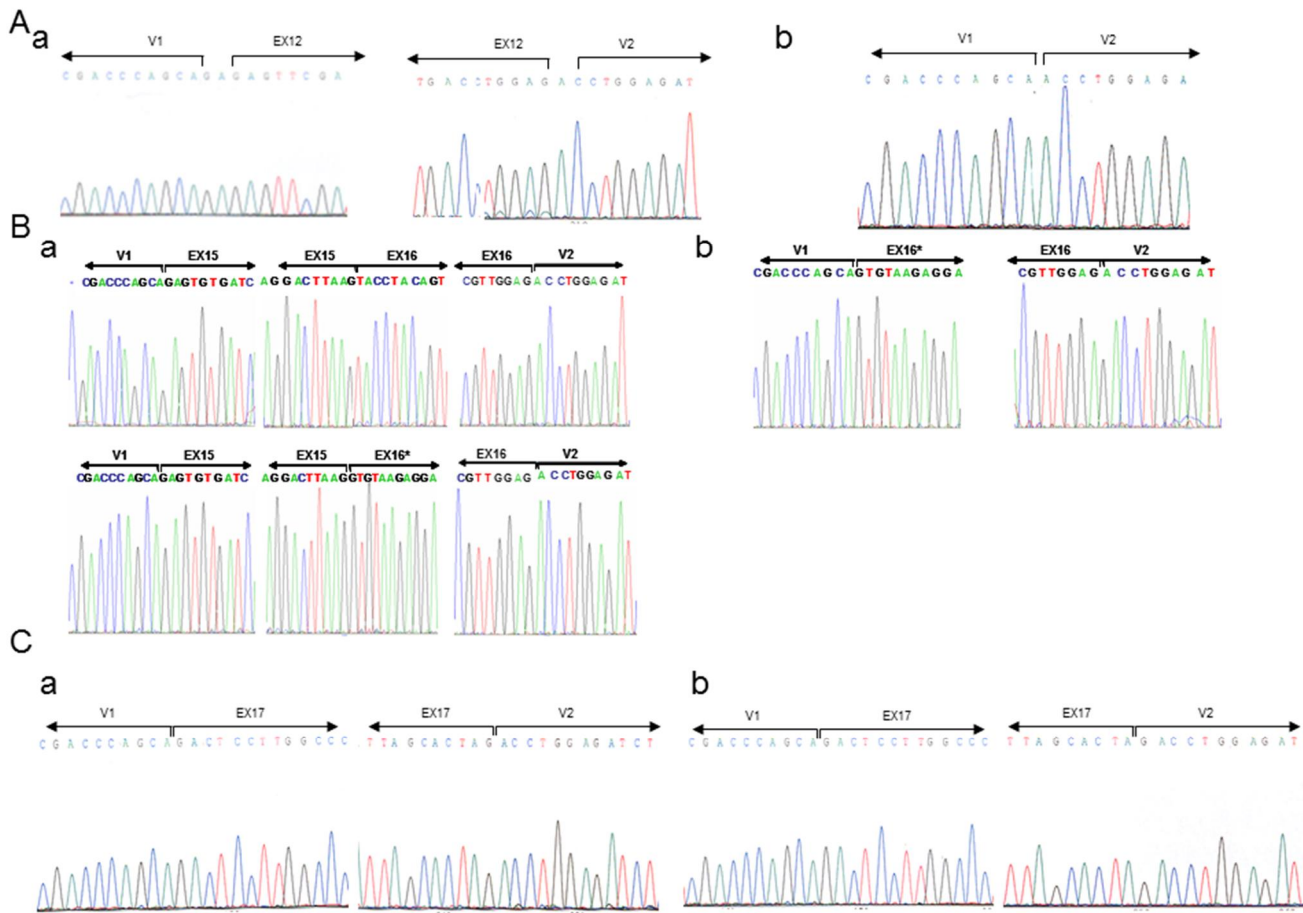

**SUPL FIG3.** Electropherograms of *EYA4* RT-PCR products obtained from NIH3T3 cells transfected with the minigene constructs. The exon junctions are indicated in each case. **A**) exon 12 Wt (a) and c.1107G>T (p.Glu369Asp) (b). **B**) exons 15-16 Wt (a) and c.1282 -1G>A (b). **C**) exon 17 Wt (a) and c.1601C>G (Ser534\*) (b). Ex12, Ex15, Ex16, Ex17 and Ex16\* of *EYA4* gene denote exons 12, 15, 16, 17 and 16 lacking the first 68 pb, respectively. V1 and V2 denote the artificial exons of the pSPL3 vector.

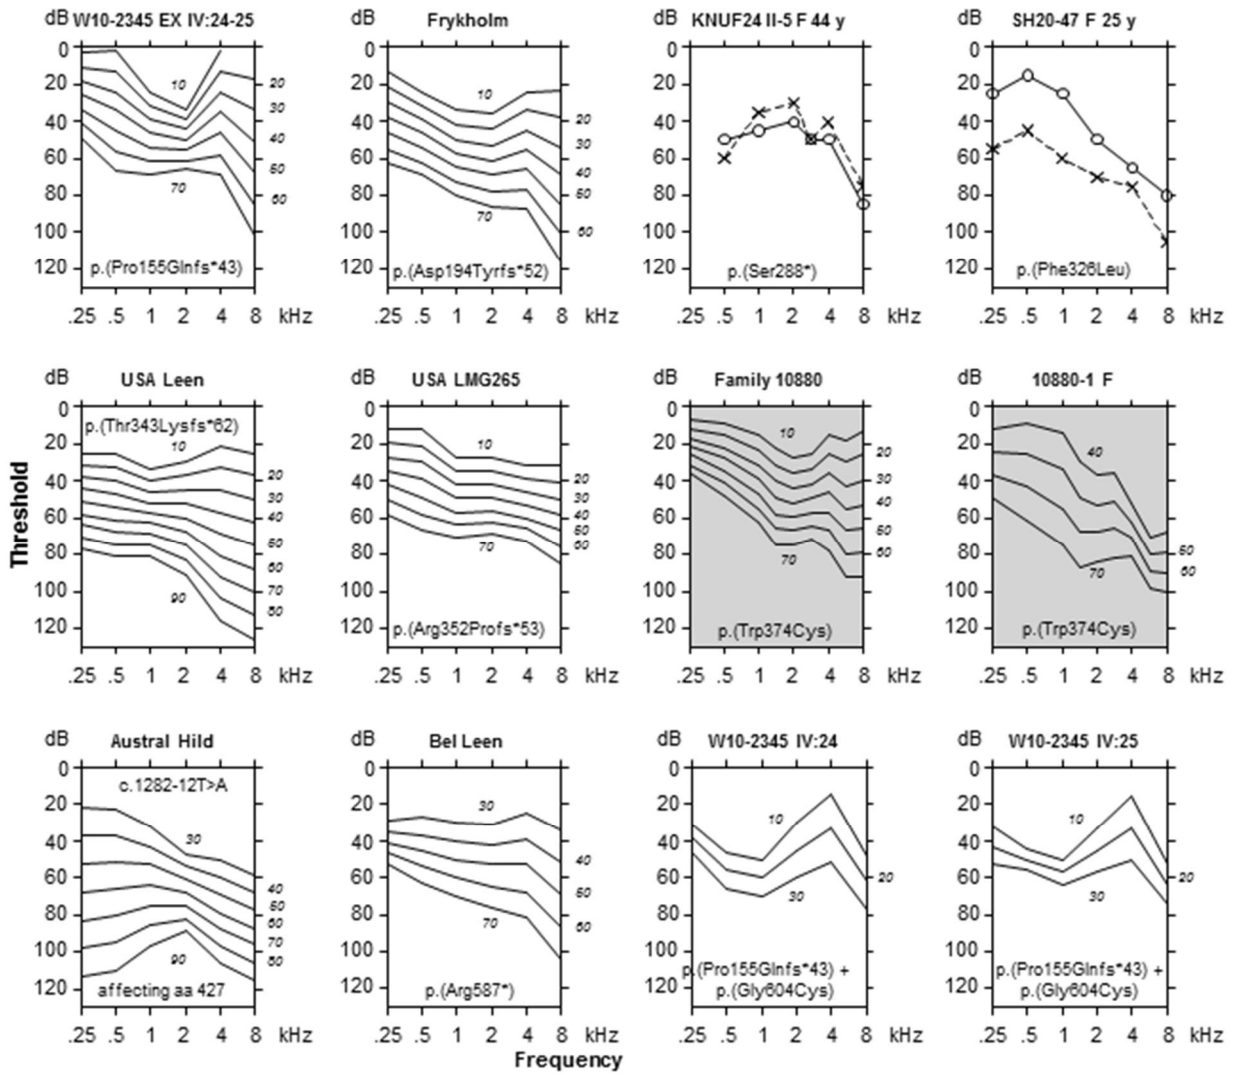

**SUPL FIG4.** Collage of the ARTA that were available for, or could be derived from, DFNA10/EYA4 traits for which audiograms have been documented. Most of these ARTA demonstrate a fairly similar picture.

A

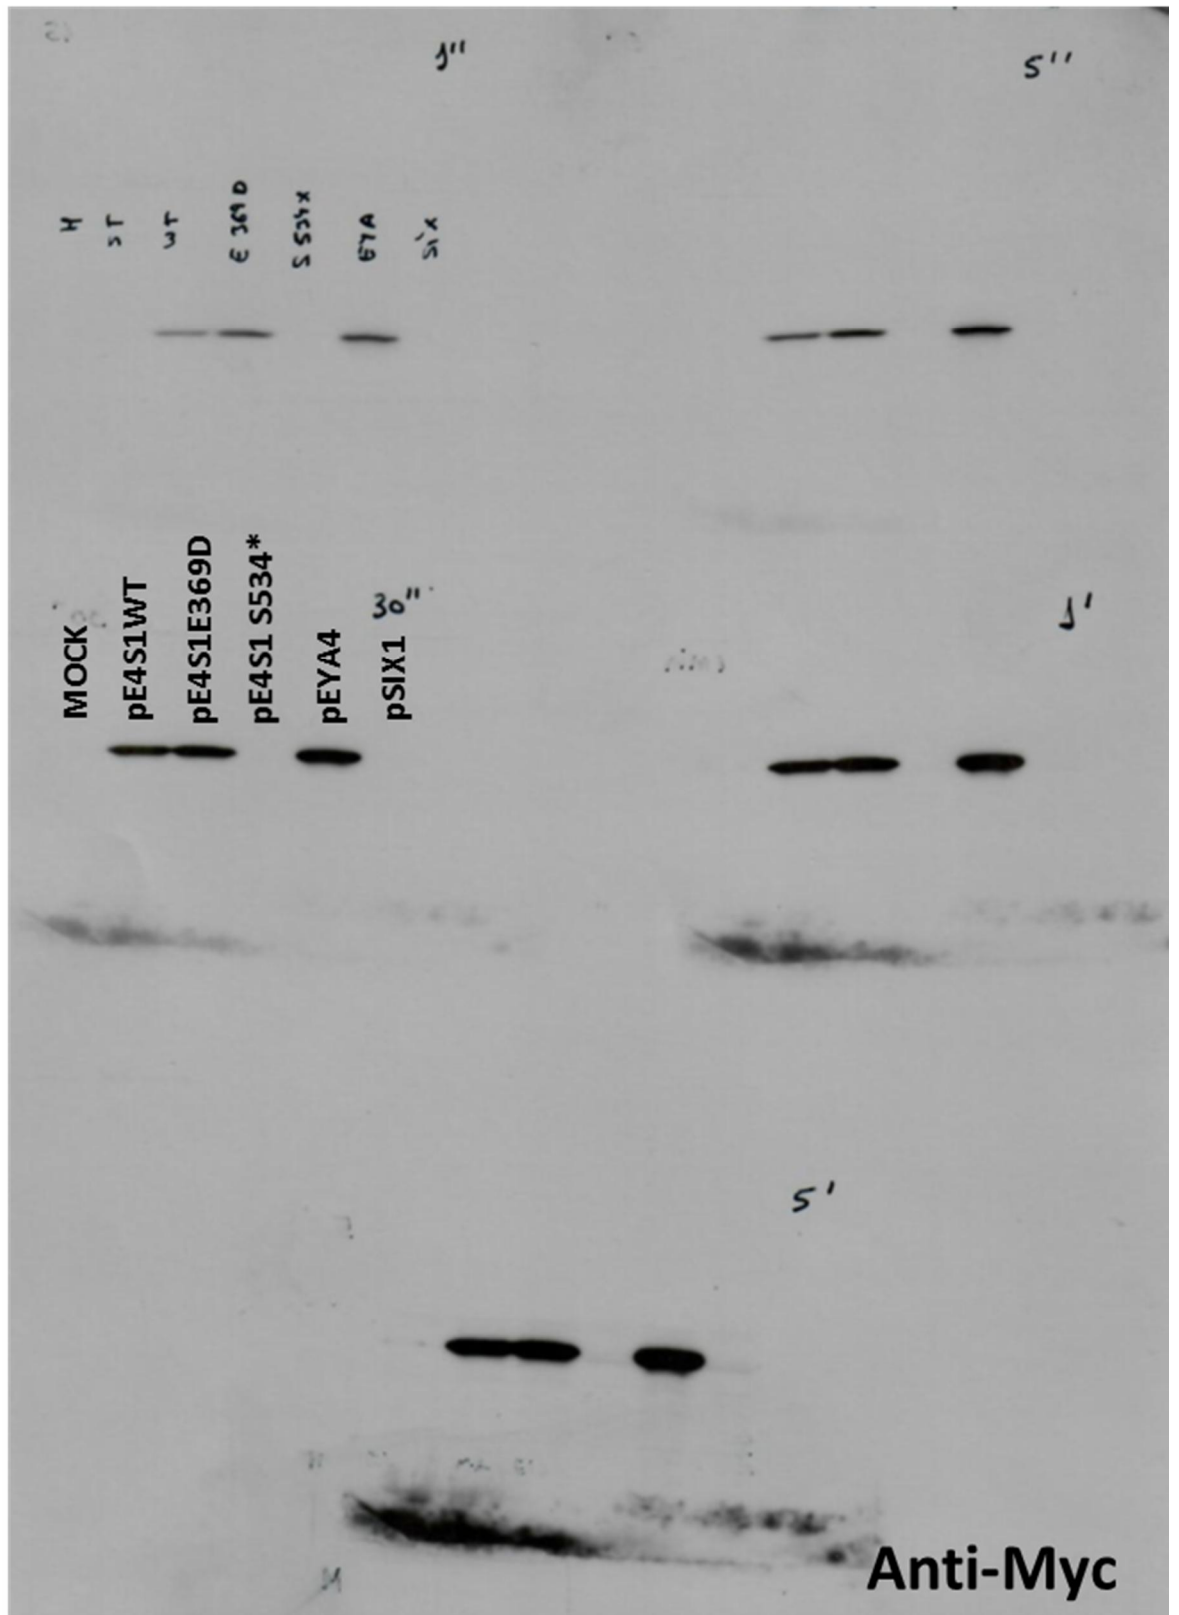

**B**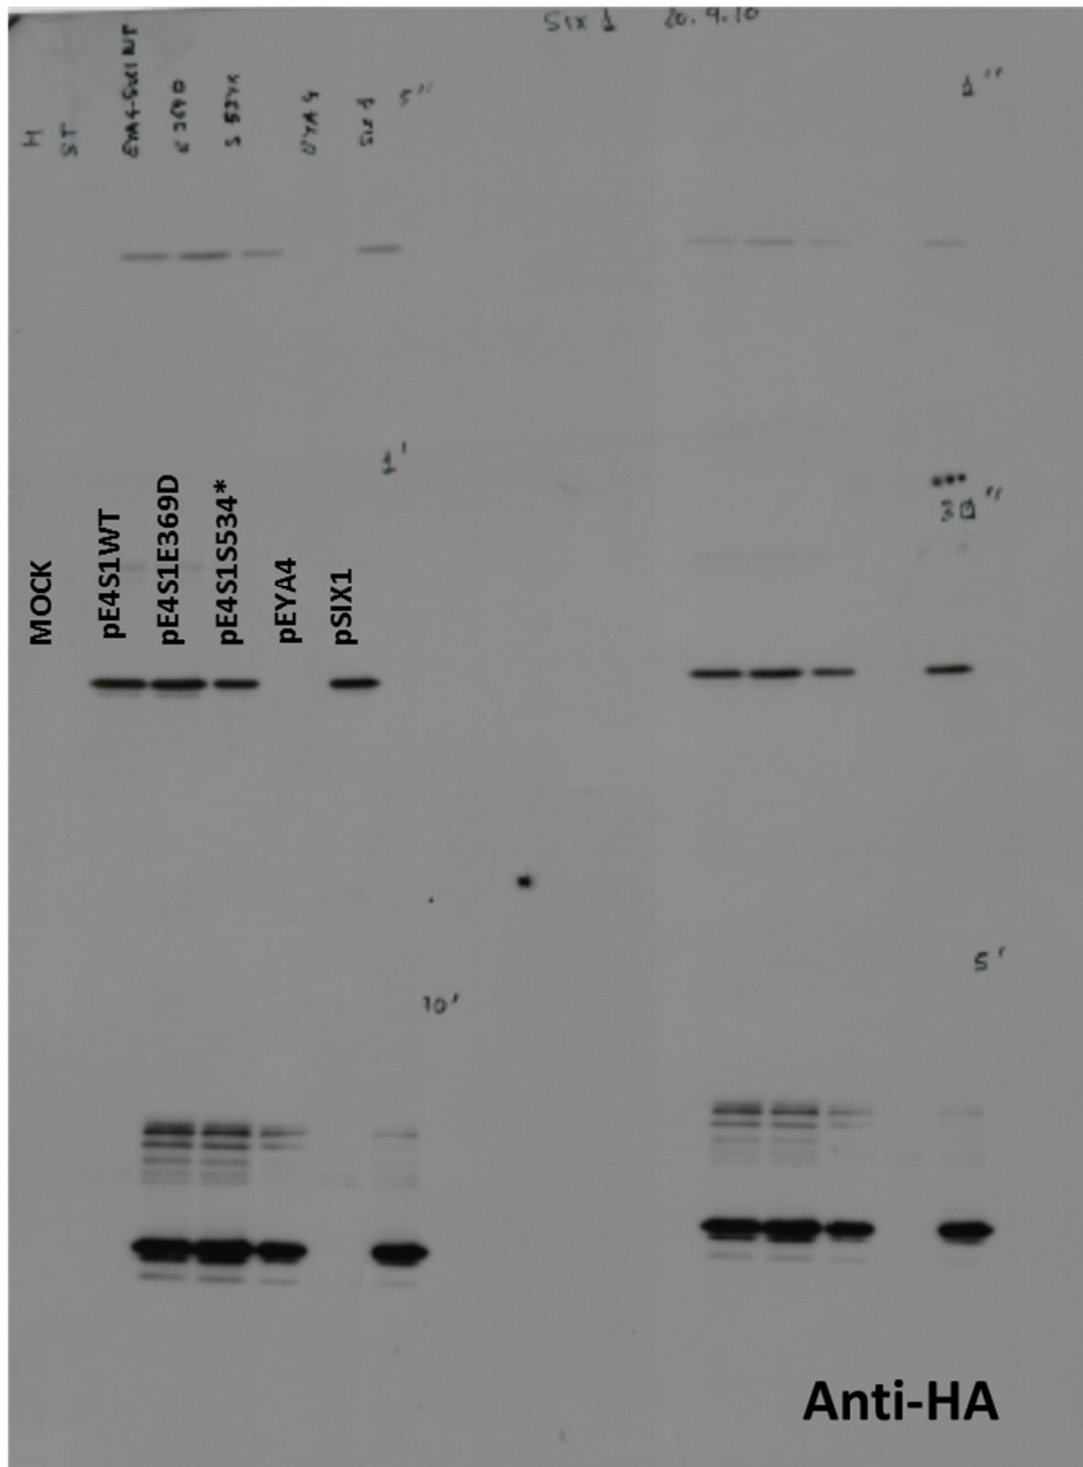

**SUPL FIG5.** Western blot analysis of *EYA4* Wt and mutants' production. The full-length blots at different time exposures have been displayed. **A)** A clear band of 37 kDa is observed in extracts from COS7 cells transfected with pE4S1 Wt and Glu369Asp bicistronic plasmid and in the control pEYA4 revealed with anti-Myc antibodies. No signal was detected in the mutant Ser534\* when we use anti-Myc antibodies. **B)** A robust band of 33kDa corresponding to Six1 was detected when we use anti-HA antibodies (at the bottom). This band was not detected in cells transfected with the control *EYA4* plasmid.
